# Supplementary material for: Genotoxicity of Aluminum and Aluminum Oxide Nanomaterials in Rats Following Oral Exposure
Source: PubMed Central journal article supplement (PMC7075173; doi:10.3390/nano10020305), 2020-02-11
Supplement: nanomaterials-10-00305-s001.pdf [file nanomaterials-10-00305-s001.pdf]

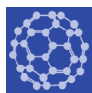

Supplementary

# Genotoxicity of Aluminum and Aluminum Oxide Nanomaterials in Rats Following Oral Exposure

Pégah Jalili <sup>1</sup>, Sylvie Huet <sup>1</sup>, Rachele Lanceleur <sup>1</sup>, Gérard Jarry <sup>1</sup>, Ludovic Le Hegarat <sup>1</sup>, Fabrice Nesslany <sup>2</sup>, Kevin Hogeveen <sup>1</sup> and Valérie Fessard <sup>1,\*</sup>

<sup>1</sup> Unité de Toxicologie des Contaminants, Agence Nationale de Sécurité Sanitaire (ANSES), 10 B rue Claude Bourgelat, 35306 Fougères, France; pjalili@uci.edu (P.J.); sylvie.huet@anses.fr (S.H.); rachele.lanceleur@anses.fr (R.L.); gerard.jarry@anses.fr (G.J.); ludovic.lehegarat@anses.fr (L.L.H.); kevin.hogeveen@anses.fr (K.H.)

<sup>2</sup> Institut Pasteur de Lille, Laboratoire de toxicologie génétique, 1 Rue du Professeur Calmette, 59019 Lille CEDEX, France; fabrice.nesslany@pasteur-lille.fr

\* Correspondence: Valerie.fessard@anses.fr; Tel.: +33-(0)2-9994-6685

Received: 9 January 2020; Accepted: 2 February 2020; Published: date

**Table S1.** Equivalence between the doses administrated between mass and Al content.

| Al form                            | 6.25 mg/kg    | 12.5 mg/kg     | 25 mg/kg       |
|------------------------------------|---------------|----------------|----------------|
| Al <sup>0</sup> NMs                | 6.25 Al mg/kg | 12.5 Al mg/kg  | 25 mg Al/kg    |
| Al <sub>2</sub> O <sub>3</sub> NMs | 3.31 mg Al/kg | 6.625 Al mg/kg | 13.25 mg Al/kg |
| AlCl <sub>3</sub>                  | 0.69 mg Al/kg | 1.375 mg Al/kg | 2.75 mg Al/kg  |

**Table S2:** Percentage of hedgehogs scored on the comet slides without Fpg. Mean ± SD (n=5 animals per condition except for control duodenum n=4).

| Tissue/organ       | Control     | Al <sup>0</sup> |             |             | Al <sub>2</sub> O <sub>3</sub> |             |             | AlCl <sub>3</sub> | MMS              |
|--------------------|-------------|-----------------|-------------|-------------|--------------------------------|-------------|-------------|-------------------|------------------|
| Dose (mg/kg)       |             | 3 x 6.25        | 3 x 12.5    | 3 x 25      | 3 x 6.25                       | 3 x 12.5    | 3 x 25      | 3 x 25            | 2 x 100 + 1 x 80 |
| <b>Duodenum</b>    | 1.05 ± 1.09 | 0.0 ± 0.0       | 1.03 ± 1.67 | 0.0 ± 0.0   | 0.0 ± 0.0                      | 0.0 ± 0.0   | 0.0 ± 0.0   | 2.03 ± 2.77       | 1.07 ± 1.68      |
| <b>Liver</b>       | 1.40 ± 2.21 | 0.52 ± 0.72     | 2.58 ± 1.97 | 2.78 ± 3.43 | 1.82 ± 1.46                    | 1.55 ± 1.68 | 1.29 ± 1.82 | 0.78 ± 1.16       | 0.52 ± 0.71      |
| <b>Kidney</b>      | 4.19 ± 4.06 | 3.28 ± 3.03     | 6.76 ± 4.76 | 7.56 ± 2.92 | 6.71 ± 5.30                    | 6.59 ± 6.14 | 3.04 ± 2.69 | 6.14 ± 3.65       | 1.04 ± 1.42      |
| <b>Spleen</b>      | 1.53 ± 2.27 | 0.78 ± 1.16     | 0.26 ± 0.59 | 0.78 ± 1.16 | 2.62 ± 5.15                    | 1.82 ± 1.46 | 2.26 ± 3.07 | 1.05 ± 1.09       | 6.11 ± 13.66     |
| <b>Bone marrow</b> | 0.2 ± 0.45  | 1.28 ± 2.19     | 1.80 ± 1.94 | 1.80 ± 2.12 | 4.68 ± 4.06                    | 1.82 ± 1.46 | 2.74 ± 3.60 | 2.07 ± 1.46       | 5.50 ± 7.66      |
| <b>Blood</b>       | 2.03 ± 2.59 | 1.55 ± 1.68     | 1.56 ± 1.40 | 0.26 ± 0.59 | 2.07 ± 1.46                    | 0.53 ± 0.72 | 1.30 ± 1.57 | 1.82 ± 1.46       | 2.20 ± 4.37      |

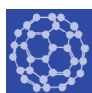

**Table S3:** Percentage of hedgehogs scored on the comet slides with Fpg. Mean  $\pm$  SD (n=5 animals per condition).

| Tissue/organ       | Control          | Al <sup>0</sup> |                 |                 | Al <sub>2</sub> O <sub>3</sub> |                 |                 | AlCl <sub>3</sub> | MMS              |
|--------------------|------------------|-----------------|-----------------|-----------------|--------------------------------|-----------------|-----------------|-------------------|------------------|
| Dose (mg/kg)       |                  | 3 x 6.25        | 3 x 12.5        | 3 x 25          | 3 x 6.25                       | 3 x 12.5        | 3 x 25          | 3 x 25            | 2 x 100 + 1 x 80 |
| <b>Duodenum</b>    | 2.75 $\pm$ 4.26  | 0.52 $\pm$ 1.16 | 0.26 $\pm$ 0.59 | 0.52 $\pm$ 0.16 | 0.0 $\pm$ 0.0                  | 0.0 $\pm$ 0.0   | 0.0 $\pm$ 0.0   | 0.39 $\pm$ 0.88   | 100 $\pm$ 0.0    |
| <b>Liver</b>       | 8.03 $\pm$ 16.49 | 2.14 $\pm$ 1.50 | 1.03 $\pm$ 1.67 | 1.03 $\pm$ 1.67 | 0.77 $\pm$ 1.72                | 2.26 $\pm$ 3.13 | 3.03 $\pm$ 2.99 | 2.81 $\pm$ 2.21   | 100 $\pm$ 0.0    |
| <b>Kidney</b>      | 7.18 $\pm$ 5.01  | 8.61 $\pm$ 4.71 | 5.03 $\pm$ 1.90 | 6.37 $\pm$ 2.70 | 3.68 $\pm$ 4.36                | 5.46 $\pm$ 3.12 | 4.00 $\pm$ 3.41 | 5.89 $\pm$ 3.91   | 100 $\pm$ 0.0    |
| <b>Spleen</b>      | 0.52 $\pm$ 1.16  | 0.80 $\pm$ 0.84 | 0.53 $\pm$ 0.72 | 0.53 $\pm$ 0.72 | 1.48 $\pm$ 3.31                | 2.05 $\pm$ 2.30 | 1.29 $\pm$ 1.82 | 0.78 $\pm$ 1.16   | 100 $\pm$ 0.0    |
| <b>Bone marrow</b> | 1.03 $\pm$ 1.67  | 1.80 $\pm$ 1.10 | 1.29 $\pm$ 1.82 | 1.30 $\pm$ 1.57 | 2.51 $\pm$ 3.15                | 2.30 $\pm$ 2.39 | 2.55 $\pm$ 2.38 | 1.80 $\pm$ 2.12   | 100 $\pm$ 0.0    |
| <b>Blood</b>       | 0.26 $\pm$ 0.59  | 1.53 $\pm$ 2.27 | 1.53 $\pm$ 2.27 | 1.28 $\pm$ 2.19 | 2.80 $\pm$ 2.40                | 1.81 $\pm$ 1.73 | 0.26 $\pm$ 0.59 | 1.54 $\pm$ 2.08   | 100 $\pm$ 0.0    |
